# Supplementary material for: Population structure and diversification of Gymnospermium kiangnanense, a plant species with extremely small populations endemic to eastern China
Source: PeerJ. 2024 Jun 24;12:e17554. doi: 10.7717/peerj.17554 (PMC11210486; doi:10.7717/peerj.17554)
Supplement: Supplemental Information 4 [file peerj-12-17554-s004.docx]

**Table S4** Prior and posterior distributions for each parameter of scenario 1 obtained using DIYABC analysis.

| Parameter | Priorsa | Mean | Median | Mode | q025 | q050 | q250 | q750 | q950 | q975 |
| --- | --- | --- | --- | --- | --- | --- | --- | --- | --- | --- |
| N1（ZJZ） | (0-5,000) | 1.43×103 | 1.17×103 | 7.94×102 | 2.72×102 | 3.70×102 | 7.33×102 | 1.87×103 | 3.42×103 | 4.02×103 |
| N2（ZJH） | (0-3,000) | 8.84×102 | 8.25×102 | 8.98×102 | 2.63×102 | 3.20×102 | 6.00×102 | 1.09×103 | 1.68×103 | 2.06×103 |
| N3（AH） | (0-2,500) | 7.04×102 | 6.17×102 | 3.80×102 | 1.34×102 | 1.95×102 | 4.24×102 | 8.94×102 | 1.42×103 | 1.78×103 |
| t1 | (0-1,200) | 3.84×102 | 3.52×102 | 2.34×102 | 5.86×101 | 9.06×101 | 2.18×102 | 5.07×102 | 8.25×102 | 9.65×102 |
| t2 | (0-2,000) | 9.77×102 | 9.32×102 | 5.95×102 | 2.35×102 | 3.02×102 | 6.04×102 | 1.30×103 | 1.83×103 | 1.90×103 |
